# Supplementary material for: Visualization of Subunit Interactions and Ternary Complexes of Protein Phosphatase 2A in Mammalian Cells
Source: PubMed Central journal article supplement (PMC4275284; doi:10.1371/journal.pone.0116074), 2014-12-23
Supplement: pone.0116074.s003.pdf [file pone.0116074.s003.pdf]

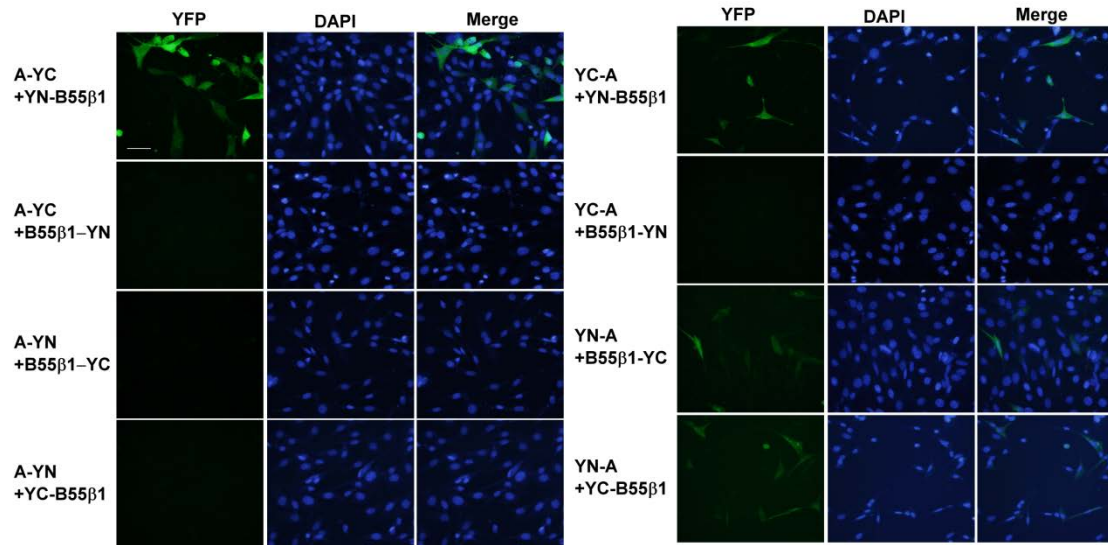

**Figure S3. BiFC analysis of various combinations of paired BiFC expression constructs encoding YN- or YC-fused A $\alpha$  and YC- or YN-fused B55 $\beta$ 1.** Equal amounts of BiFC expression constructs encoding YN- or YC-fused A $\alpha$  and YC- or YN-fused B55 $\beta$ 1 were co-transfected into NIH3T3 cells, and 24 h after transfection, YFP signals due to BiFC of paired YN- or YC-fused A $\alpha$  and B55 $\beta$ 1 were measured by fluorescence microscopy. DAPI was applied for staining of nuclei. Scale bar: 50  $\mu$ m.
