# Supplementary material for: Visualization of Subunit Interactions and Ternary Complexes of Protein Phosphatase 2A in Mammalian Cells
Source: PubMed Central journal article supplement (PMC4275284; doi:10.1371/journal.pone.0116074), 2014-12-23
Supplement: pone.0116074.s005.pdf [file pone.0116074.s005.pdf]

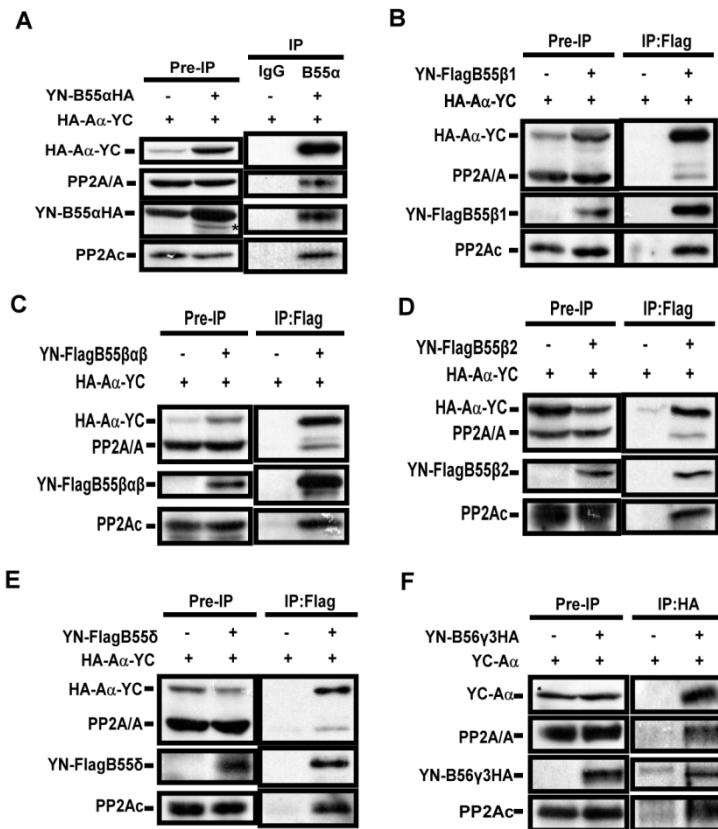

**Figure S5. Co-immunoprecipitation of BiFC complexes of PP2A/A $\alpha$  and various B subunits.** (A) Lysates of NIH3T3 cells co-transfected with pCMV-HA-PP2A/A $\alpha$ -YFPC and pcDNA1-YFPN-B55 $\alpha$ HA or empty vector were immunoprecipitated (IP) by a pan-anti-B55 antibody or by preimmune IgG as a control, and the immunocomplexes were analyzed by SDS-PAGE and Western blotting by specific anti-PP2A/A $\alpha$ , anti-HA, and anti-PP2Ac $\alpha$  antibodies. The asterisk indicates YFPN-B55 $\alpha$ HA. (B-E) Lysates of NIH3T3 cells co-transfected with pCMV-HA-PP2A/A $\alpha$ -YFPC and pcDNA1-YFPN-FLAG-B55 $\beta$ 1, pcDNA1-YFPN-FLAG-B55 $\beta$ 2, pcDNA1-YFPN-FLAG-B55 $\delta$ , pcDNA1-YFPN-FLAG-B55 $\beta$  $\alpha$  $\beta$ , or empty vector were immunoprecipitated (IP) by anti-FLAG-Sepharose, and the immunocomplexes were analyzed by SDS-PAGE and Western blotting (WB) by specific anti-PP2A/A $\alpha$ , anti-FLAG, and anti-PP2Ac $\alpha$  antibodies. (F) Lysates of NIH3T3 cells co-transfected with pcDNA1-YFPC-PP2A/A $\alpha$  and pcDNA1-YFPN-B56 $\gamma$ 3HA or empty vector were immunoprecipitated (IP) by anti-HA antibody, and the immunocomplexes were analyzed by SDS-PAGE and Western blotting by specific anti-PP2A/A $\alpha$ , anti-HA, and anti-PP2Ac $\alpha$  antibodies.
