# Supplementary material for: Visualization of Subunit Interactions and Ternary Complexes of Protein Phosphatase 2A in Mammalian Cells
Source: PubMed Central journal article supplement (PMC4275284; doi:10.1371/journal.pone.0116074), 2014-12-23
Supplement: pone.0116074.s007.pdf [file pone.0116074.s007.pdf]

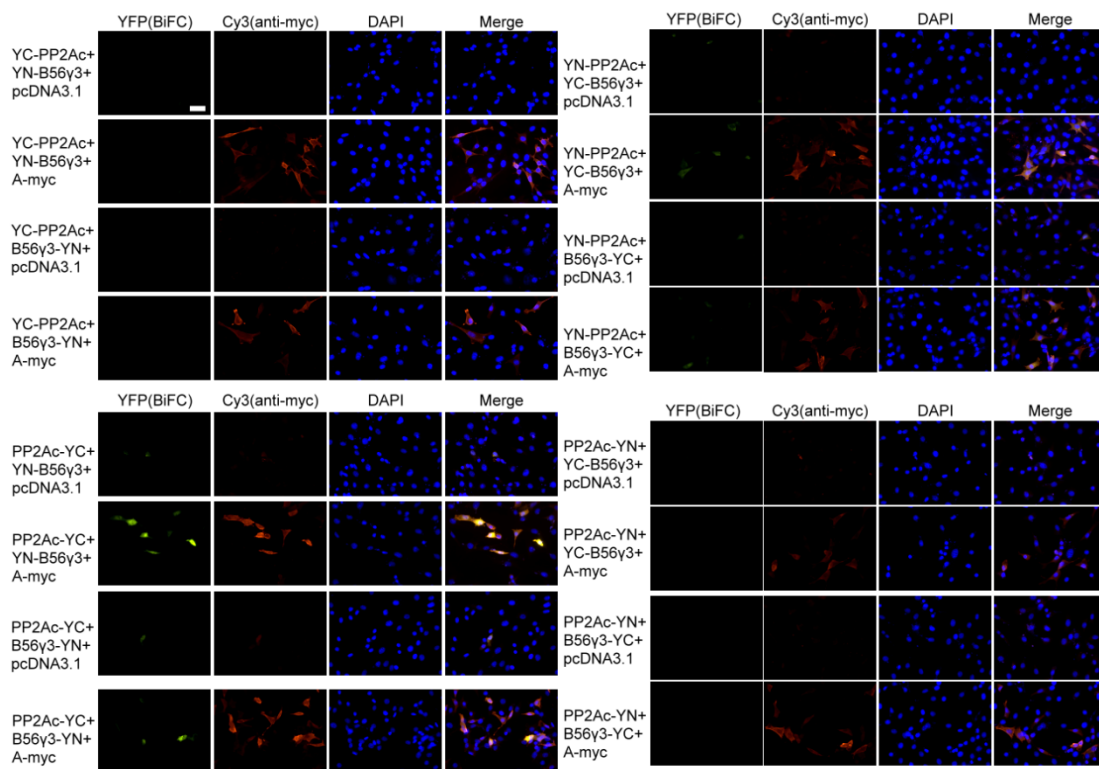

**Figure S7. BiFC analysis of various combinations of paired BiFC expression constructs encoding YN- or YC-fused PP2A $\alpha$  and YC- or YN-fused B56 $\gamma$ 3 with or without co-expression of 6myc-PP2A/A $\alpha$ .** Equal amounts of BiFC expression constructs encoding YN- or YC-fused PP2A $\alpha$  and YC- or YN-fused B56 $\gamma$ 3 with or without equal amounts of pCA2-6myc-PP2A/A $\alpha$  or vector were co-transfected into NIH3T3 cells, and 24 h after transfection, YFP signals due to BiFC were measured by direct fluorescence microscopy and expression of 6myc-PP2A/A $\alpha$  was confirmed by indirect immunofluorescence using anti-Myc tag antibody in conjunction with Cy3-conjugated secondary antibody. DAPI was applied for staining of nuclei. Scale bar: 50  $\mu$ m.
