# Supplementary material for: Visualization of Subunit Interactions and Ternary Complexes of Protein Phosphatase 2A in Mammalian Cells
Source: PubMed Central journal article supplement (PMC4275284; doi:10.1371/journal.pone.0116074), 2014-12-23
Supplement: pone.0116074.s010.pdf [file pone.0116074.s010.pdf]

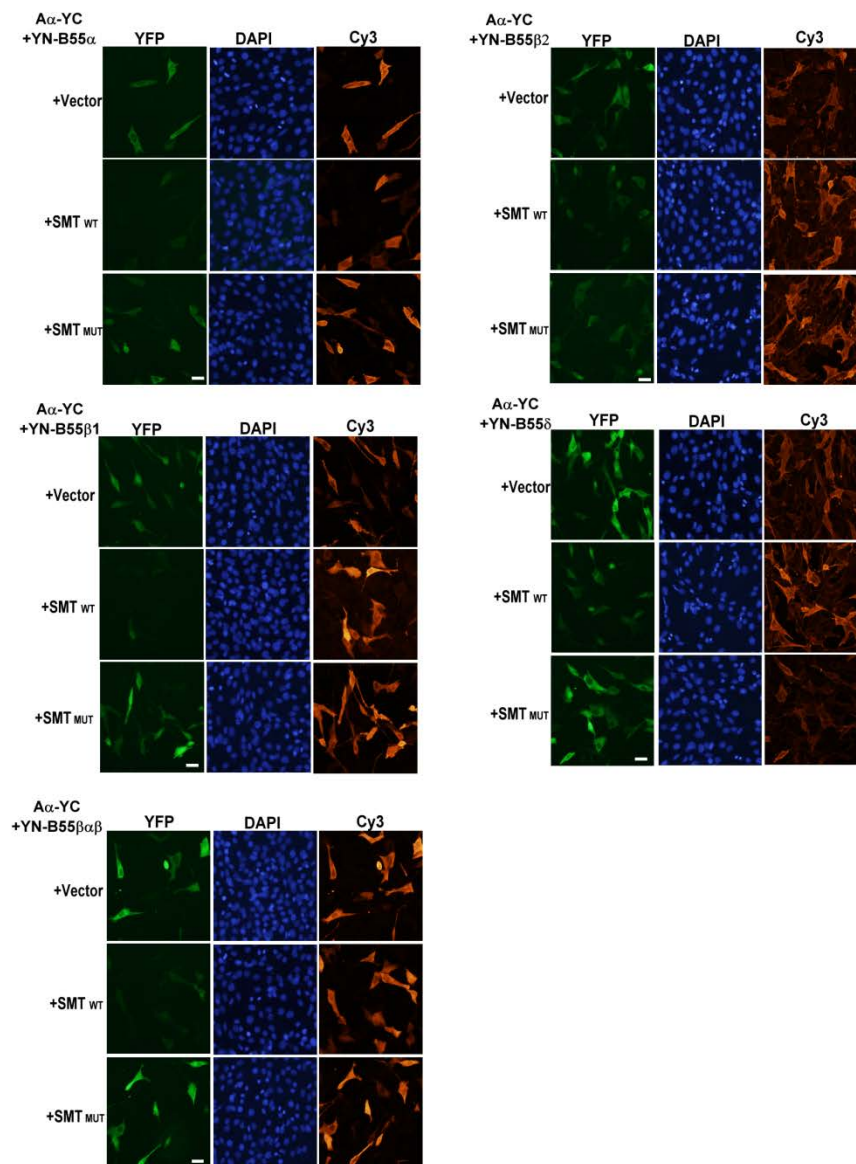

**Figure S10. BiFC between A $\alpha$ -YC and YN-B55 $\alpha$ , YN-fused B55 $\beta$ 1, B55 $\beta$ 2, B55 $\beta\alpha\beta$ , or B55 $\delta$  and BiFC between YC-A $\alpha$  and YN-B56 $\gamma$ 3 is disrupted by SV40 SMT.** BiFC expression constructs encoding A $\alpha$ -YC and YN-fused B55 $\alpha$ , B55 $\beta$ 1, B55 $\beta$ 2, B55 $\beta\alpha\beta$ , or B55 $\delta$  and BiFC expression constructs encoding YC-A $\alpha$  and YN-B56 $\gamma$ 3 with pCMV5 SMT<sub>WT</sub>, -SMT<sub>MUT</sub>, or empty vector with a 1:1:2 ratio (A $\alpha$ -YC or YC-A $\alpha$ :YN-B:pCMV5-SMT<sub>WT</sub>, pCMV5-SMT<sub>MUT</sub>, or empty vector=1:1:2), were transfected into NIH3T3 cells, and 24 h after transfection, YFP signals due to BiFC were measured by fluorescence microscopy. Expression of HA-tagged YN-fused B55 $\alpha$ , B55 $\beta$ 1, B55 $\beta$ 2, B55 $\beta\alpha\beta$ , B55 $\delta$ , or B56 $\gamma$ 3 was confirmed using anti-HA antibody by indirect immunofluorescence microscopy as described earlier. DAPI was applied for staining of nuclei. Scale bar: 50  $\mu$ m.
