# Supplementary material for: Visualization of Subunit Interactions and Ternary Complexes of Protein Phosphatase 2A in Mammalian Cells
Source: PubMed Central journal article supplement (PMC4275284; doi:10.1371/journal.pone.0116074), 2014-12-23
Supplement: pone.0116074.s011.pdf [file pone.0116074.s011.pdf]

**Table S1. Plasmids used in this study.**

| Plasmid                                                | Description                                                                                  | Reference                      |
|--------------------------------------------------------|----------------------------------------------------------------------------------------------|--------------------------------|
| pcDNA3.1/Zeo(+)-B55 $\alpha$ -HA                       | Cloned by PCR-based method; see the supplementary materials and methods                      | this study                     |
| pcDNA3.1/Zeo(+)-B55 $\beta$ -HA                        | Cloned by PCR-based method; see the supplementary materials and methods                      | this study                     |
| pcDNA3.1/Zeo(+)-B55 $\beta\alpha$ -HA                  | Cloned by PCR-based method; see the supplementary materials and methods                      | this study                     |
| pcDNA3.1/Zeo(+)-B55 $\beta$ 2-HA                       | Cloned by PCR-based method; see the supplementary materials and methods                      | this study                     |
| pcDNA5/TO-Flag-B55 $\beta$ 2mut (RR168EE)              | Provided by Dr. Stefan Strack, University of Iowa, USA                                       | Dagda <i>et al.</i> , 2003     |
| pcDNA3.1/Zeo(+)-B55 $\delta$ -HA                       | Cloned by PCR-based method; see the supplementary materials and methods                      | this study                     |
| pcDNA3.1/Zeo(+)-B56 $\gamma$ 3-HA                      | Cloned by PCR-based method                                                                   | Lee <i>et al.</i> , 2010       |
| pHM6-HA-PP2A $\alpha$                                  | pHM6 with HA-tagged human PP2A $\alpha$                                                      | Chuang <i>et al.</i> , 2000    |
| pcDNA5/TO-Flag- $\alpha$ 4                             | pcDNA5/TO with FLAG-tagged $\alpha$ 4                                                        | McConnell <i>et al.</i> , 2010 |
| pcDNA5/TO-Flag- $\alpha$ 4mut(R155E/K158D)             | pcDNA5/TO with FLAG-tagged $\alpha$ 4(R155E/K158D)                                           | McConnell <i>et al.</i> , 2010 |
| pCMV5-small T wt                                       | pCMV5 with SV40 Small t antigen                                                              | Sontag <i>et al.</i> , 1993    |
| pCMV5-small T mut                                      | pCMV5 with mutant SV40 Small t antigen (1-110)                                               | Sontag <i>et al.</i> , 1993    |
| pcDNAI/Amp YFP-N (1-158)                               | pcDNAI/Amp with YFP (1-158)                                                                  | Hynes <i>et al.</i> , 2004     |
| pcDNAI/Amp YFP-C (159-238)                             | pcDNAI/Amp with YFP (159-238)                                                                | Hynes <i>et al.</i> , 2004     |
| pBiFC-bFosYC155                                        | pCMV-HA-YFP-C(155-238) with bFos                                                             | Hu <i>et al.</i> , 2002        |
| pBiFC-bJunYN155                                        | pFLAG-CMV2-YFP-N (1-154) with bJun                                                           | Hu <i>et al.</i> , 2002        |
| pFLAG-CMV2-YN                                          | Derived from pBiFC-bFosYC155 by cutting out bFos                                             | this study                     |
| pCMV-HA-YC                                             | Derived from pBiFC-bFosYC155 by cutting out bFos                                             | this study                     |
| pcDNAI-YN A $\alpha$ (encoding YN-A $\alpha$ )         | pcDNAI/Amp YN with PP2A/A $\alpha$ ; see the supplementary materials and methods             | this study                     |
| pcDNAI-YC A $\alpha$ (encoding YC-A $\alpha$ )         | pcDNAI/Amp YN with PP2A/A $\alpha$ ; see the supplementary materials and methods             | this study                     |
| pcDNAI-YN B55 $\alpha$ -HA (encoding YN-B55 $\alpha$ ) | pcDNAI/Amp YN with HA-tagged PP2A/B55 $\alpha$ ; see the supplementary materials and methods | this study                     |

|                                                                             |                                                                                                             |            |
|-----------------------------------------------------------------------------|-------------------------------------------------------------------------------------------------------------|------------|
| pcDNAI-YC B55 $\alpha$ -HA(encoding YC-B55 $\alpha$ )                       | pcDNAI/Amp YC with HA-tagged PP2A/B55 $\alpha$ ; see the supplementary materials and methods                | this study |
| pcDNAI-YN FLAG-B55 $\beta$ 1(encoding YN-B55 $\beta$ 1)                     | pcDNAI/Amp YN with FLAG-tagged PP2A/B55 $\beta$ 1; see the supplementary materials and methods              | this study |
| pcDNAI-YC FLAG-B55 $\beta$ 1(encoding YC-B55 $\beta$ 1)                     | pcDNAI/Amp YC with FLAG-tagged PP2A/B55 $\beta$ 1; see the supplementary materials and methods              | this study |
| pcDNAI-YN FLAG-B55 $\beta$ 2(encoding YN-B55 $\beta$ 2)                     | pcDNAI/Amp YN with FLAG-tagged PP2A/B55 $\beta$ 2; see the supplementary materials and methods              | this study |
| pcDNAI-YC FLAG-B55 $\beta$ 2(encoding YC-B55 $\beta$ 2)                     | pcDNAI/Amp YC with FLAG-tagged PP2A/B55 $\beta$ 2; see the supplementary materials and methods              | this study |
| pcDNAI-YN FLAG-B55 $\beta\alpha\beta$ (encoding YN-B55 $\beta\alpha\beta$ ) | pcDNAI/Amp YN with FLAG-tagged PP2A/B55 $\beta\alpha\beta$ ; see the supplementary materials and methods    | this study |
| pcDNAI-YC FLAG-B55 $\beta\alpha\beta$ (encoding YC-B55 $\beta\alpha\beta$ ) | pcDNAI/Amp YC with FLAG-tagged PP2A/B55 $\beta\alpha\beta$ ; see the supplementary materials and methods    | this study |
| pcDNAI-YN FLAG-B55 $\beta$ 2mut(encoding YN-B55 $\beta$ 2mut)               | pcDNAI/Amp YN with FLAG-tagged PP2A/B55 $\beta$ 2mut (RR168EE); see the supplementary materials and methods | this study |
| pcDNAI-YC FLAG-B55 $\beta$ 2mut (encoding YC-B55 $\beta$ 2mut)              | pcDNAI/Amp YC with FLAG-tagged PP2A/B55 $\beta$ 2mut (RR168EE); see the supplementary materials and methods | this study |
| pcDNAI-YN FLAG-B55 $\delta$ (encoding YN-B55 $\delta$ )                     | pcDNAI/Amp YN with FLAG-tagged PP2A/B55 $\delta$ ; see the supplementary materials and methods              | this study |
| pcDNAI-YC FLAG-B55 $\delta$ (encoding YC-B55 $\delta$ )                     | pcDNAI/Amp YC with FLAG-tagged PP2A/B55 $\delta$ ; see the supplementary materials and methods              | this study |
| pcDNAI-YN B56 $\gamma$ 3-HA(encoding YN-B56 $\gamma$ 3)                     | pcDNAI/Amp YN with HA-tagged PP2A/B56 $\gamma$ 3; see the supplementary materials and methods               | this study |

|                                               |                                                                                      |            |
|-----------------------------------------------|--------------------------------------------------------------------------------------|------------|
| pcDNAI-YC-B56γ3-HA(encoding YC-B56γ3)         | pcDNAI/Amp YN with HA-tagged PP2A/B56γ3; see the supplementary materials and methods | this study |
| pcDNAI-YN-PP2Aα(encoding YN-PP2Aα)            | pcDNAI/Amp YN with PP2Aα; see the supplementary materials and methods                | this study |
| pcDNAI-YC-PP2Aα(encoding YC-PP2Aα)            | pcDNAI/Amp YC with PP2Aα; see the supplementary materials and methods                | this study |
| pCMV2-FLAG-Aα-YN(encoding Aα-YN)              | pCMV2-FLAG-YN with PP2A Aα                                                           | this study |
| pCMV-HA-Aα-YC(encoding Aα-YC)                 | pCMV-HA-YC with PP2A Aα                                                              | this study |
| pCMV2-FLAG-B55β1-YN(encoding B55β1-YN)        | pCMV2-FLAG-YN with PP2A B55β1                                                        | this study |
| pCMV-B55β1-HA-YC(encoding B55β1-YC)           | pCMV-HA-YC with PP2A B55β1                                                           | this study |
| pCMV2-FLAG-B55βαβ-YN(encoding B55βαβ-YN)      | pCMV2-FLAG-YN with PP2A B55βαβ                                                       | this study |
| pCMV-B55βαβ-HA-YC(encoding B55βαβ-YC)         | pCMV-HA-YC with PP2A B55βαβ                                                          | this study |
| pCMV2-FLAG-B55β2-YN(encoding B55β2-YN)        | pCMV2-FLAG-YN with PP2A B55β2                                                        | this study |
| pCMV-B55β2-HA-YC(encoding B55β2-YC)           | pCMV-HA-YC with PP2A B55β2                                                           | this study |
| pCMV2-FLAG-B55β2mut-YN(encoding B55β2mut -YN) | pCMV2-FLAG-YN with PP2A B55β2mut(RR168EE)                                            | this study |
| pCMV-B55β2mut -HA-YC(encoding B55β2mut-YC)    | pCMV-HA-YC with PP2A B55β2 mut (RR168EE)                                             | this study |
| pCMV2-FLAG-B55δ-YN(encoding B55δ-YN)          | pCMV2-FLAG-YN with PP2A B55δ                                                         | this study |
| pCMV-HA-B55δ-YC(encoding B55δ-YC)             | pCMV-HA-YC with PP2A B55δ                                                            | this study |
| pCMV2-FLAG-PP2Aα-YN(encoding PP2Aα-YN)        | pCMV2-FLAG-YN with PP2Aα                                                             | this study |
| pCMV-HA-PP2Aα-YC(encoding PP2Aα-YC)           | pCMV-HA-YC with PP2Aα                                                                | this study |
| pcDNAI/Amp YN-MYC-α4(encoding YN-α4)          | pcDNAI/Amp YN with MYC-tagged α4                                                     | this study |
| pcDNAI/Amp YC-α4mut(encoding YC-α4 mut)       | pcDNAI/Amp YN with MYC-tagged α4mut (R155E/K158D)                                    | this study |

|                                                               |                                                         |            |
|---------------------------------------------------------------|---------------------------------------------------------|------------|
| pCMV-MYC- $\alpha$ 4-YC(encoding $\alpha$ 4-YC)               | pCMV-HA-YC with MYC tagged- $\alpha$ 4                  | this study |
| pCMV-MYC- $\alpha$ 4mut-YC(encoding $\alpha$ 4mut-YC)         | pCMV-HA-YC with MYC tagged- $\alpha$ 4 mut(R155E/K158D) | this study |
| pECFP-C1-PP2A $\alpha$ (encoding CFP-PP2A $\alpha$ )          | pECFP-C1 with PP2A $\alpha$                             | This study |
| pECFP-N1-FLAG-B55 $\beta$ 2(encoding CFP-B55 $\beta$ 2)       | pECFP-N1 with FLAG-tagged B55 $\beta$ 2                 | This study |
| pECFP-N1-FLAG-B55 $\beta$ 2mut(encoding CFP-B55 $\beta$ 2mut) | pECFP-N1 with FLAG-tagged B55 $\beta$ 2 mut (RR168EE)   | This study |

### Table S1 References

1. Dagda RK, Zaucha JA, Wadzinski BE, Strack S (2003) A developmentally regulated, neuron-specific splice variant of the variable subunit Bbeta targets protein phosphatase 2A to mitochondria and modulates apoptosis. *J Biol Chem.* **278**:24976-24985
2. Lee TY, Lai TY, Lin SC, Wu CW, Ni IF, Yang YS, Hung LY, Law BK, Chiang CW (2010) The B56gamma3 regulatory subunit of protein phosphatase 2A (PP2A) regulates S phase-specific nuclear accumulation of PP2A and the G1 to S transition. *J Biol Chem.* **285**:21567-21580
3. Chuang E, Fisher TS, Morgan RW, Robbins MD, Duerr JM, Vander Heiden MG, Gardner JP, Hambor JE, Neveu MJ, Thompson CB (2000) The CD28 and CTLA-4 receptors associate with the serine/threonine phosphatase PP2A. *Immunity* **13**:313-322
4. McConnell JL, Watkins GR, Soss SE, Franz HS, McCorvey LR, Spiller BW, Chazin WJ, Wadzinski BE (2010) Alpha4 is a ubiquitin-binding protein that regulates protein serine/threonine phosphatase 2A ubiquitination. *Biochemistry* **49**:1713-1718
5. Sontag E, Fedorov S, Kamibayashi C, Robbins D, Cobb M, Mumby M (1993) The interaction of SV40 small tumor antigen with protein phosphatase 2A stimulates the map kinase pathway and induces cell proliferation. *Cell* **75**:887-897
6. Hynes TR, Tang L, Mervine SM, Sabo JL, Yost EA, Devreotes PN, Berlot CH (2004) Visualization of G protein betagamma dimers using bimolecular fluorescence complementation demonstrates roles for both beta and gamma in subcellular targeting. *J Biol Chem.* **279**:30279-30286
7. Hu CD, Chinenov Y, Kerppola TK (2002) Visualization of interactions among bZIP and Rel family proteins in living cells using bimolecular fluorescence complementation. *Mol Cell.* **9**:789-98
