# Supplementary material for: Visualization of Subunit Interactions and Ternary Complexes of Protein Phosphatase 2A in Mammalian Cells
Source: PubMed Central journal article supplement (PMC4275284; doi:10.1371/journal.pone.0116074), 2014-12-23
Supplement: pone.0116074.s012.pdf [file pone.0116074.s012.pdf]

**Table S2. Primers used in this study.**

| Plasmids                                                        | Forward primer                                                                          | Reverse primer                             |
|-----------------------------------------------------------------|-----------------------------------------------------------------------------------------|--------------------------------------------|
| pcDNAI-YN-Flag-B55 $\beta$ 1                                    | 5'-GGCTCGAGGTACCAAGCT<br>TGAATTCGACTACAAAGACG<br>ATGACGATAAA-3'                         | 5'-GGTCTAGAGGACTAGTATTC<br>AGTATG-3'       |
| pcDNAI-YC-Flag-B55 $\beta$ 1                                    | 5'-GGCTCGAGGTACCAAGCT<br>TGAATTCGACTACAAAGACG<br>ATGACGATAAA-3'                         | 5'-GGTCTAGAGGACTAGTATTC<br>AGTATG-3'       |
| pcDNAI-YN-Flag-B55 $\beta\alpha\beta$                           | 5'-GGCTCGAGGTACCAAGCT<br>TGAATTCATGGAGGAGGACA<br>TTCAATGG-3'                            | 5'-GGTCTAGAGGACTAGTATTC<br>AGTATG-3'       |
| pcDNAI-YC-Flag-B55 $\beta\alpha\beta$                           | 5'-GGCTCGAGGTACCAAGCT<br>TGAATTCATGGAGGAGGACA<br>TTCAATGG-3'                            | 5'-GGTCTAGAGGACTAGTATTC<br>AGTATG-3'       |
| pcDNAI-YN-Flag-B55 $\beta$ 2<br>pcDNAI-YN-Flag-B55 $\beta$ 2mut | 5'-GGCTCGAGGGCCACCAA<br>GCTTATGAAATGCTTCTCTCG<br>TTAC-3'                                | 5'-GGTCTAGACTGCAGAATTCC<br>ACCACA-3'       |
| pcDNAI-YC-Flag-B55 $\beta$ 2<br>pcDNAI-YC-Flag-B55 $\beta$ 2mut | 5'-GGCTCGAGGGCCACCAA<br>GCTTATGAAATGCTTCTCTCG<br>TTAC-3'                                | 5'-GGTCTAGACTGCAGAATTCC<br>ACCACA-3'       |
| pcDNAI-YN-Myc- $\alpha$ 4<br>pcDNAI-YN-Myc- $\alpha$ 4mut       | 5'-GGAGATCTGCCACCATGG<br>AGCAAAAGCTCATTTCTGAA<br>GAGGACTTGATGGCTGCTGA<br>GGACGAGTTAC-3' | 5'-GGGTCGACTCAGCCCATGTT<br>CTGTCCG-3'      |
| pcDNAI-YN-Flag-B55 $\beta$ 2<br>pcDNAI-YN-Flag-B55 $\beta$ 2mut | 5'-GGCTCGAGGGCCACCAA<br>GCTTATGAAATGCTTCTCTCG<br>TTAC-3'                                | 5'-GGTCTAGACTGCAGAATTCC<br>ACCACA-3'       |
| pcDNAI-YN-Myc- $\alpha$ 4<br>pcDNAI-YN-Myc- $\alpha$ 4mut       | 5'-GGAGATCTGCCACCATGG<br>AGCAAAAGCTCATTTCTGAA<br>GAGGACTTGATGGCTGCTGA<br>GGACGAGTTAC-3' | 5'-GGGTCGACTCAGCCCATGTT<br>CTGTCCG-3'      |
| pFLAG-CMV2-A $\alpha$ -YN                                       | 5'-GGGAATTCGGCACGAGCC<br>AAGAT-3'                                                       | 5'-GGGCTAGCGGCAAGAGAGA<br>GAACAGTCAG-3'    |
| pFLAG-CMV2-C $\alpha$ -YN                                       | 5'-GGGAATTC AATGGACGAG<br>AAGGTGTTAC-3'                                                 | 5'-GGGCTAGCCAGGAAGTAGT<br>CTGGGGTACG-3'    |
| pFLAG-CMV2-B55 $\delta$ -YN                                     | 5'-GGGAATTC AATGGCAGGA<br>GCCGG-3'                                                      | 5'-GGGCTAGCATTAATTTTGTG<br>CTGGAATATATA-3' |

|                                               |                                                                                         |                                                                             |
|-----------------------------------------------|-----------------------------------------------------------------------------------------|-----------------------------------------------------------------------------|
| pFLAG-CMV2-B55β2-YN                           | 5'-GGCTCGAGGGCCACCAA<br>GCTTATGAAATGCTTCTCTCG<br>TTAC-3'                                | 5'-GGTCTAGAATTAACCTTGTC<br>CTGGAATATATA-3'                                  |
| pCMV-HA-Aα-YC                                 | 5'-GGGAATTCGGGCACGAGC<br>CAAGATGGCAG-3'                                                 | 5'-GGGGTACCGCAAGAGAGA<br>GAACAGTCAG-3'                                      |
| pCMV-HA-Cα-YC                                 | 5'-GGGAATTCGGATGGACGA<br>GAAGGTGTTCACCA-3'                                              | 5'-GGGGTACCCAGGAAGTAGT<br>CTGGGGTACG-3'                                     |
| pCMV-HA-B55δ-YC                               | 5'-GGGAATTCGGATGGCAGG<br>AGCCG-3'                                                       | 5'-GGGGTACCATTAATTTTGTC<br>CTGGAATATATA-3'                                  |
| pCMV-HA-B55β2-YC                              | 5'-GGCTCGAGGGCCACCAA<br>GCTTATGAAATGCTTCTCTCG<br>TTAC-3'                                | 5'-GGGGTACCAGCGTAGTCTG<br>GGACGTCGTATGGGTAATTAA<br>CCTTGTCCTGGAATAT-3'      |
| pCMV-Myc-α4-YC<br>pCMV-Myc-α4mut-YC           | 5'-GGGGGCCCGCCACCATGG<br>AGCAAAAGCTCATTTCTGAA<br>GAGGACTTGATGGCTGCTGA<br>GGACGAGTTAC-3' | 5'-GGGGTACCGCCCATGTTCTG<br>TCGGTTC-3'                                       |
| pECFP-N1-Flag-B55β2<br>pECFP-N1-Flag-B55β2mut | 5'-GGAAGCTTGCGCCACCAT<br>GAAATGCTTCTC-3'                                                | 5'-GGGTCGACTGTTTATCGTCA<br>TCGTCTTTGTAGTCATTAACCT<br>TGTCTGGAATATATATAAG-3' |
| pECFP-C1-PP2Aα                                | 5'-GGGGATCCATGGACGAGA<br>AGGTGTTC-3'                                                    | 5'-GGGAATTCCTTACAGGAAGT<br>AGTCTGGGG-3'                                     |
