# Supplementary material for: Visualization of Subunit Interactions and Ternary Complexes of Protein Phosphatase 2A in Mammalian Cells
Source: PubMed Central journal article supplement (PMC4275284; doi:10.1371/journal.pone.0116074), 2014-12-23
Supplement: pone.0116074.s013.pdf [file pone.0116074.s013.pdf]

### **Text S1. Construction of expression plasmids.**

The original constructs harboring cDNAs encoding subunits of PP2A include pcDNA3.1/Zeo(+)-A $\alpha$ , pCA2-6XMYC-A $\alpha$ , pcDNA3.1/Zeo(+)-B55 $\alpha$ -HA, pcDNA5/TO-Flag-B55 $\beta$ , pcDNA5/TO-Flag-B55 $\beta\alpha\beta$ , pcDNA5/TO-Flag-B55 $\beta$ 2, pcDNA5/TO-Flag-B55 $\beta$ 2mut (RR168EE) (a kind gift from Dr. Stefan Strack, Department of Pharmacology, University of Iowa, USA), pcDNA5/TO-Flag-B55 $\delta$ , pcDNA3.1/Zeo(+)-B56 $\gamma$ 3-HA, pHM6-C $\alpha$ , pcDNA5/TO-Flag- $\alpha$ 4, and pcDNA5/TO-Flag- $\alpha$ 4mut. pCMV5-small T wt and pCMV5-small T mut are kind gifts of Dr. Estelle Sontag, University of Newcastle, Australia. BiFC expression vectors pcDNAI/Amp YFP (1-158) and pcDNAI/Amp YFP (159-238) were kind gifts of Dr. Catherine Berlot, Weis Center for Research, Geisinger Clinic, USA. BiFC expression vectors pFLAG-CMV2-YFPN (1-154) and pCMV2-HA-YFPC (155-238) were obtained by excising cDNAs of bFos and bJun from pBiFC-bFosYC155 and pBiFC-bJunYN155 (kind gifts from Dr. Tom Kerppola, HHMI, University of Michigan, USA), respectively. For constructing BiFC expression vectors encoding YFPN- and YFPC-fused to the N-terminus of A $\alpha$ , cDNA of A $\alpha$  was excised from pcDNA3.1/Zeo(+)-A $\alpha$  by BamHI and NotI digestion, and subcloned into BglIII and NotI sites of pcDNAI/Amp YFP (1-158) and pcDNAI/Amp YFP (159-238). For constructing BiFC expression vectors encoding YFPN- and YFPC-fused to the C-terminus of A $\alpha$ , cDNA of A $\alpha$  was amplified by PCR, digested with EcoRI and NheI, or EcoRI and KpnI, and subcloned into EcoRI and NheI sites of pFLAG-CMV2-YFPN or EcoRI and KpnI sites of pCMV2-HA-YFPC, respectively. For constructing BiFC expression vectors encoding YFPN- and YFPC-fused to the N-terminus of B55 $\alpha$ , cDNA of B55 $\alpha$  was excised from pcDNA3.1/Zeo(+)-B55 $\alpha$ -HA by BglIII and XhoI digestion, and then subcloned into BglIII and XhoI sites of pcDNAI-YFPN and pcDNAI-YFPC. For constructing BiFC expression vectors encoding YFPN- and YFPC-fused to the N-terminus of B55 $\delta$ , cDNA of B55 $\delta$  was excised from pcDNA5/TO-Flag-B55 $\delta$  by BamHI and XhoI digestion, and then subcloned into BglIII and XhoI sites of pcDNAI-YFPN and pcDNAI-YFPC. For constructing BiFC expression vectors encoding YFPN- and YFPC-fused to the N-terminus of B56 $\gamma$ 3, cDNA of B56 $\gamma$ 3 was excised from pcDNA3.1/Zeo(+)-B56 $\gamma$ 3-HA by BamHI and XhoI, and then subcloned into BglIII and XhoI sites of pcDNAI-YFPN and pcDNAI-YFPC. For constructing BiFC expression vectors encoding YFPN- and YFPC-fused to the N-terminus of B55 $\beta$ 2, B55 $\beta$ 2mut (RR168EE), and B55 $\beta\alpha\beta$ , cDNAs of B55 $\beta$ 2, B55 $\beta$ 2mut (RR168EE), and B55 $\beta\alpha\beta$  were amplified by PCR using plasmids described earlier and a XhoI site on the 5' end and a XbaI site on the 3' end were introduced, then subcloned into XhoI and XbaI sites of pcDNAI-YFPN and pcDNAI-YFPC. For constructing BiFC

expression vectors encoding YFPN- and YFPC-fused to the N-terminus of  $\alpha 4$  or  $\alpha 4\text{mut}$ , cDNAs of  $\alpha 4$  or  $\alpha 4\text{mut}$  were amplified by PCR using plasmids described earlier, and a myc-epitope tag and a BglIII site on the 5' end, and a SalI site on the 3' end were introduced, and subcloned into BglIII and XhoI sites of pcDNAI-YFPN and pcDNAI-YFPC. For constructing BiFC expression vectors encoding YFPN- and YFPC-fused to the C-terminus of  $A\alpha$ ,  $C\alpha$ , and B55 $\delta$ , cDNAs of  $A\alpha$ ,  $C\alpha$ , and B55 $\delta$  were amplified by PCR using plasmids described earlier, and a EcoRI site on the 5' end, and a NheI site on the 3' end were introduced, and subcloned into EcoRI and XbaI sites of pFLAG-CMV2-YFPN. For constructing BiFC expression vectors encoding YFPN- and YFPC-fused to the C-terminus of B55 $\beta$ , B55 $\beta 2$ , B55 $\beta 2\text{mut}$ , and B55 $\beta\alpha\beta$ , cDNAs of B55 $\beta$ , B55 $\beta 2$ , B55 $\beta 2\text{mut}$ , and B55 $\beta\alpha\beta$  were amplified by PCR using plasmids described earlier, and a HindIII site on the 5' end, and a XbaI site on the 3' end were introduced, and subcloned into HindIII and XbaI sites of pFLAG-CMV2-YFPN. For constructing BiFC expression vectors encoding YFPN- and YFPC-fused to the C-terminus of  $\alpha 4$  or  $\alpha 4\text{mut}$ , cDNAs of  $\alpha 4$  or  $\alpha 4\text{mut}$  were amplified by PCR using plasmids described earlier, an ApaI site on the 5' end, and a KpnI site on the 3' end were introduced, and subcloned into ApaI and KpnI sites of pCMV2-HA-YFPC. For CFP-fusion expression vector of  $C\alpha$ , cDNAs of  $C\alpha$  amplified by PCR using plasmid described earlier, a Flag-epitope tag and a BamHI site on the 5' end, and a EcoRI site on the 3' end were introduced, and subcloned into BamHI and EcoRI sites of pECFP-N1 (Clontech). For CFP-fusion expression vectors of B55 $\beta 2$  and B55 $\beta 2\text{mut}$ , cDNAs of B55 $\beta 2$  and B55 $\beta 2\text{mut}$  were amplified by PCR using plasmid described earlier, a Flag-epitope tag and a HindIII site on the 5' end, and a SalI site on the 3' end were introduced, and were subcloned into HindIII and SalI sites of pECFP-C1 (Clontech).
